# Supplementary material for: Detection of genome-edited cells by oligoribonucleotide interference-PCR
Source: PubMed Central journal article supplement (PMC6105111; doi:10.1093/dnares/dsy012), 2018-04-27
Supplement: dsy012_supplementary_figures_s1-s14.pdf [file dsy012_supplementary_figures_s1-s14.pdf]

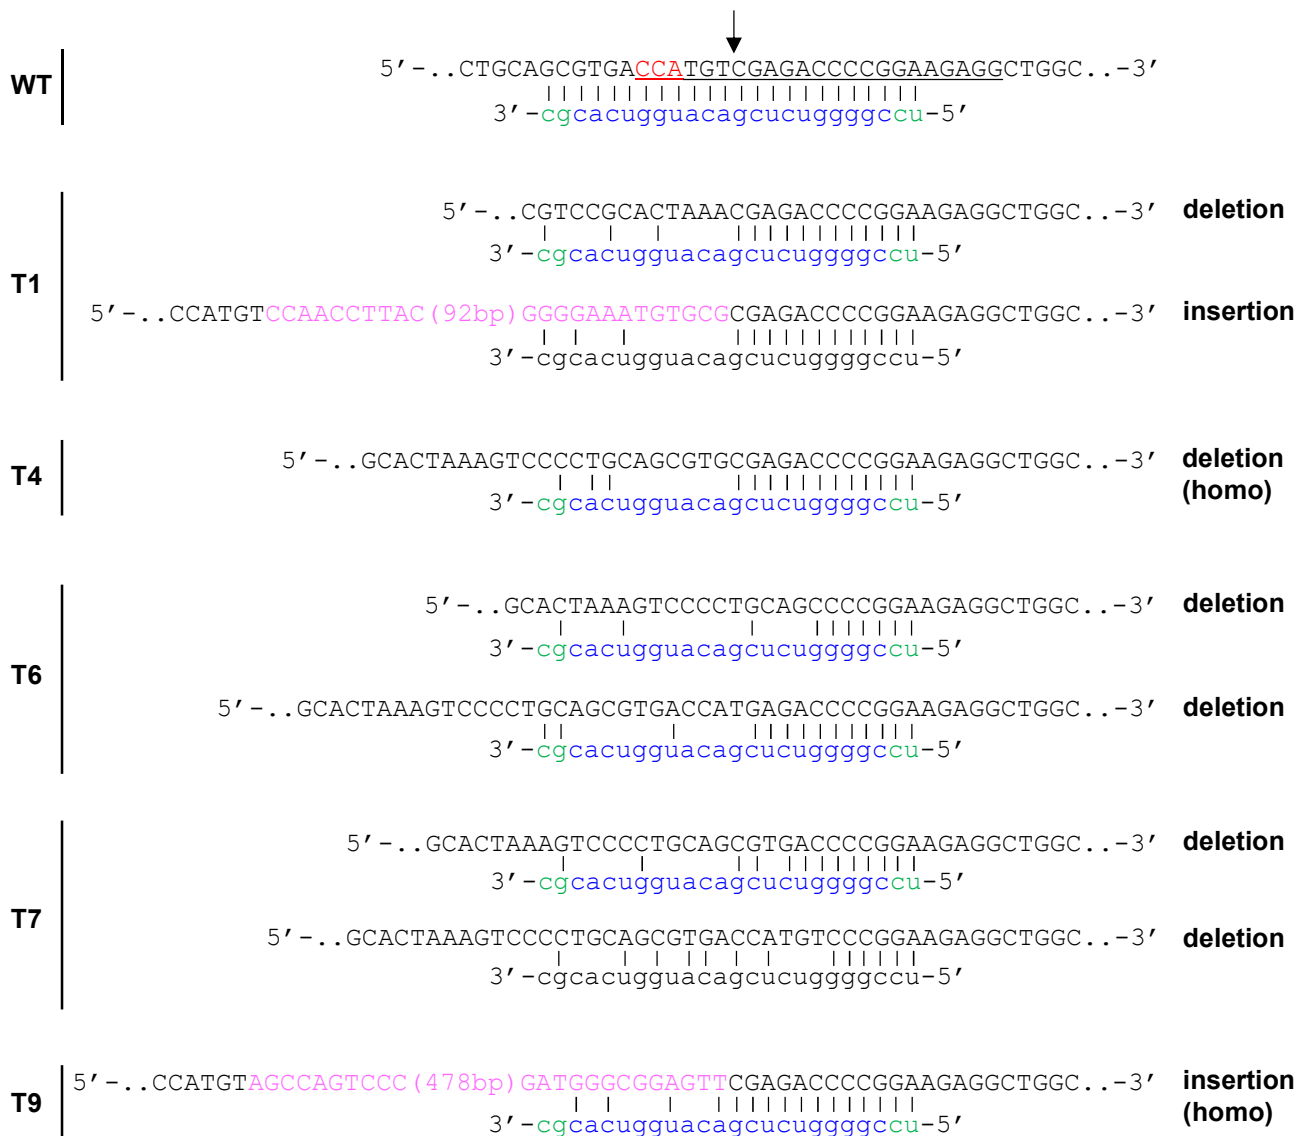

**Supplementary Figure S1**



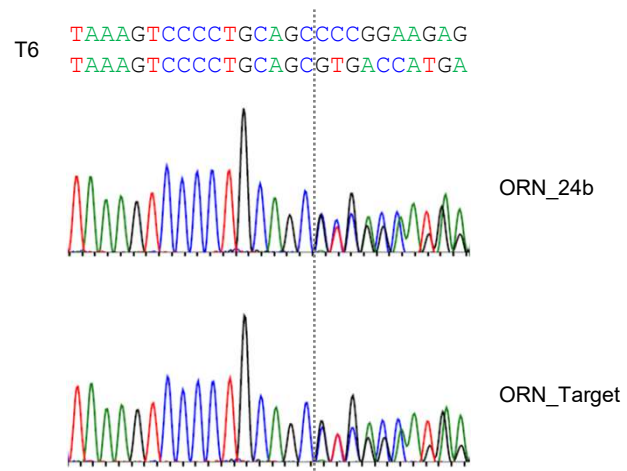

**Supplementary Figure S3**

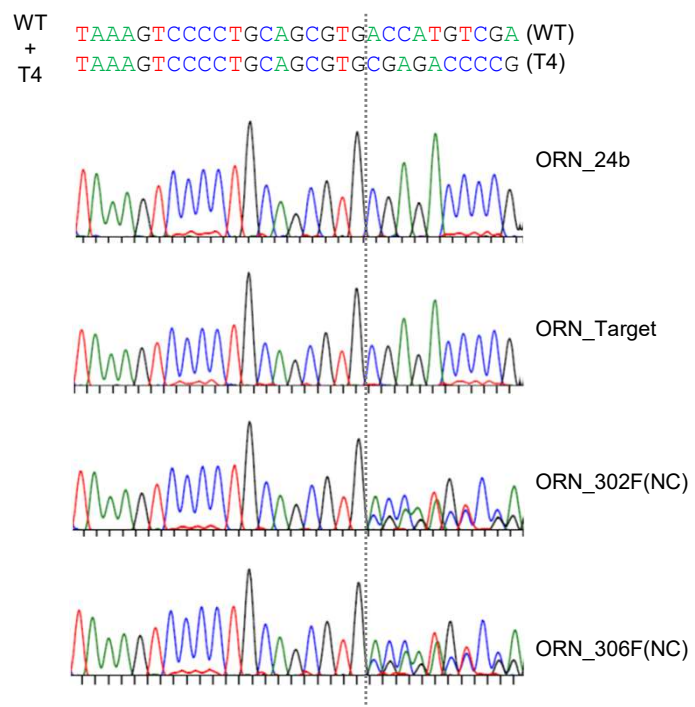

**Supplementary Figure S4**

**A**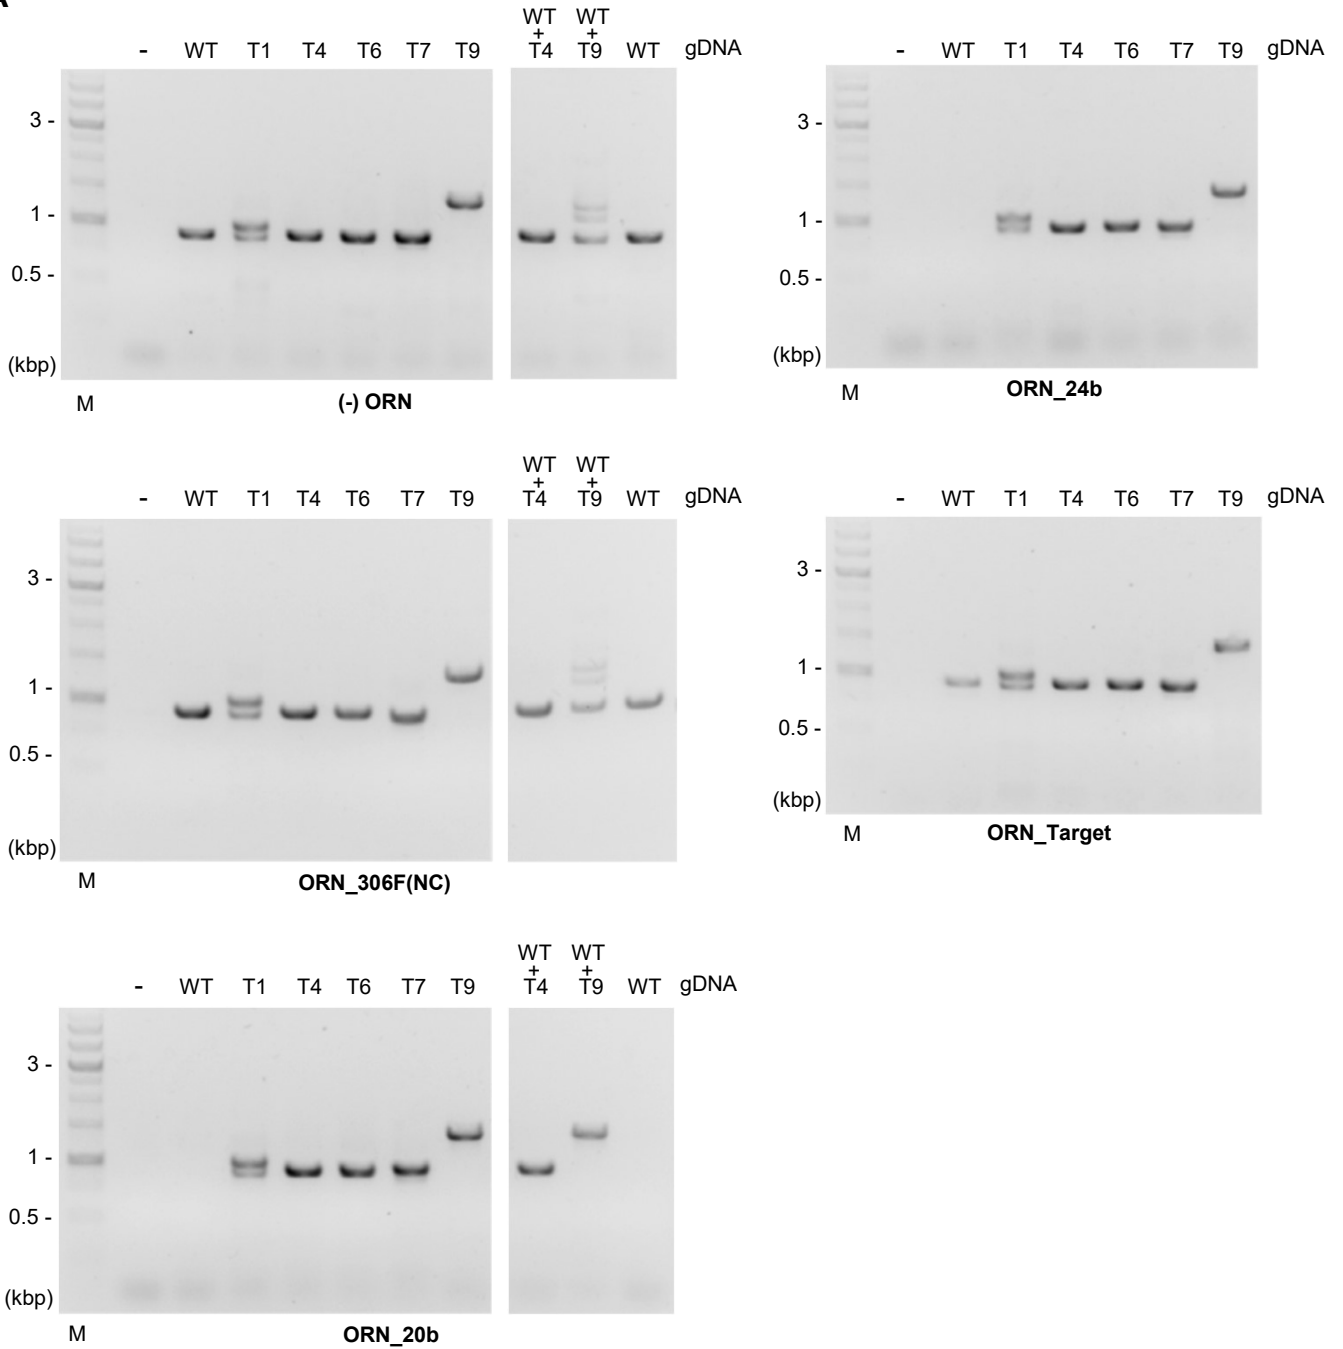**B**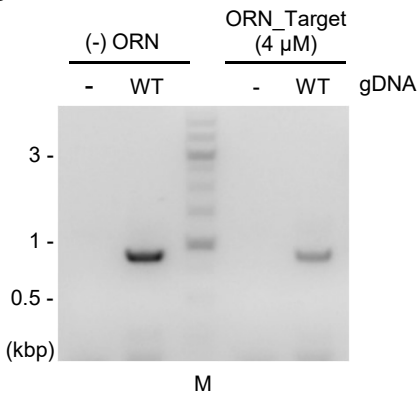**C**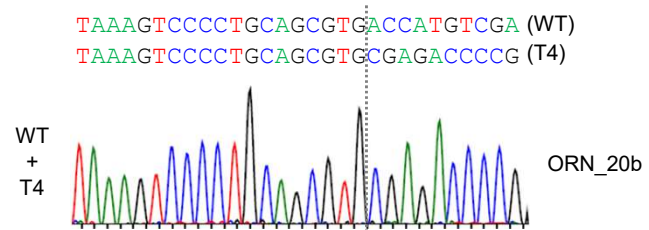**Supplementary Figure S5**

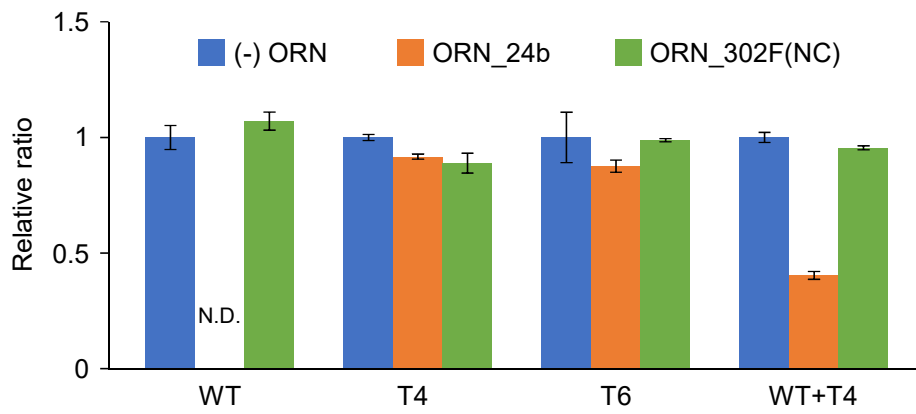

**Supplementary Figure S6**

**A**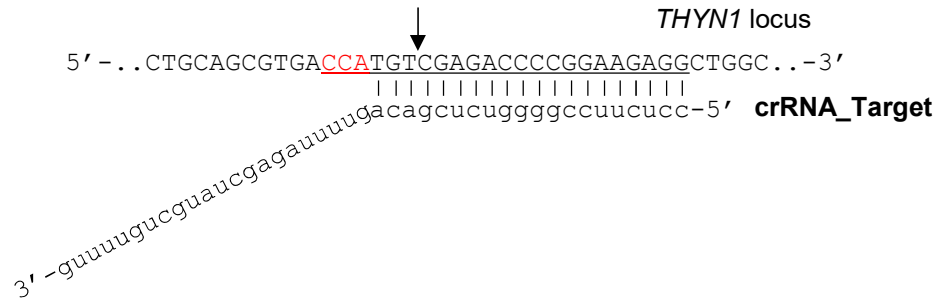**B**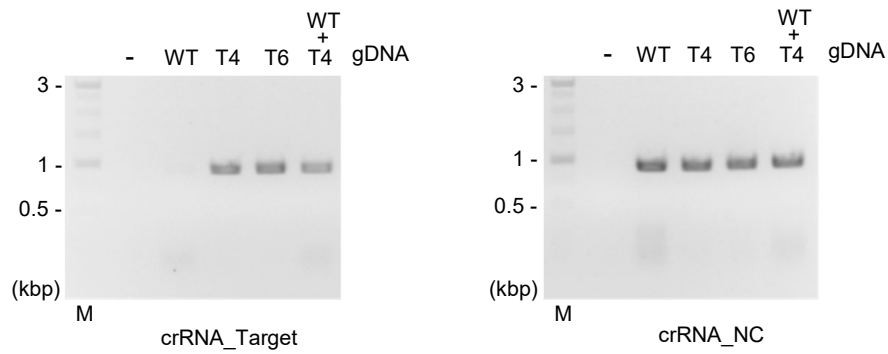**C**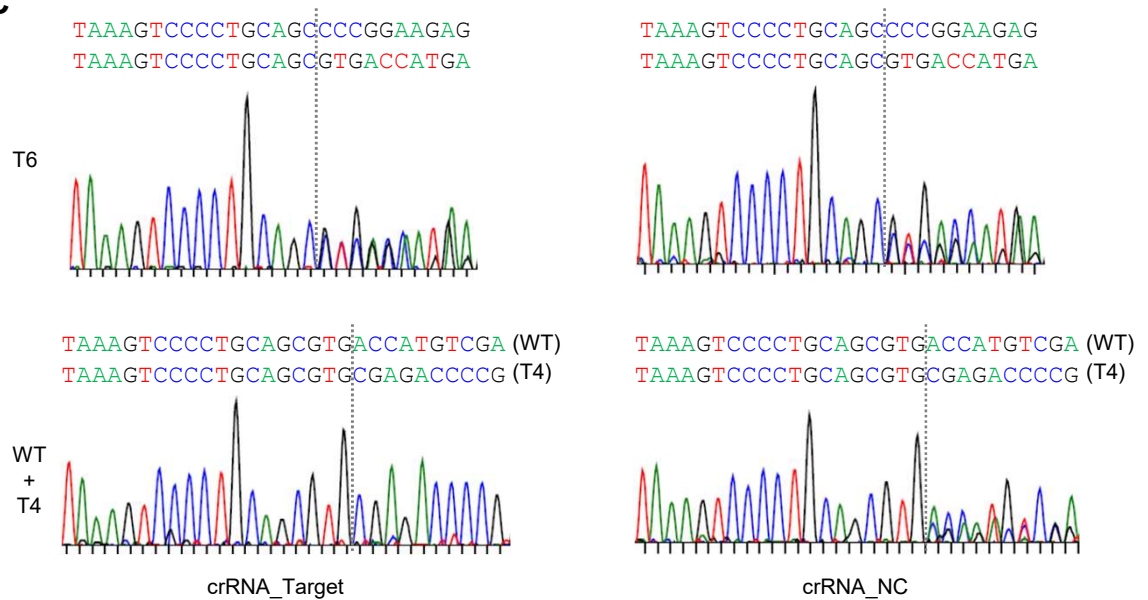**Supplementary Figure S7**

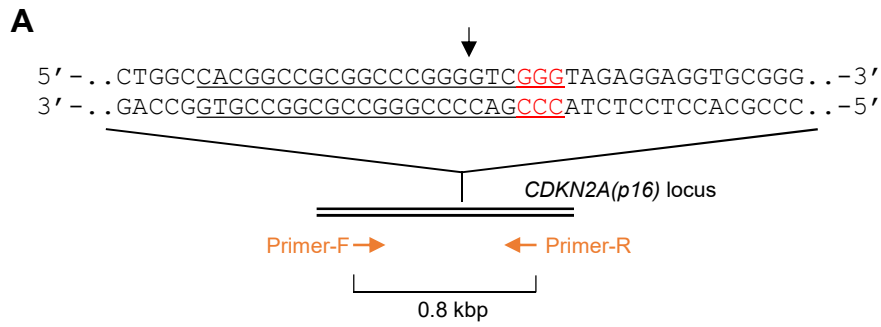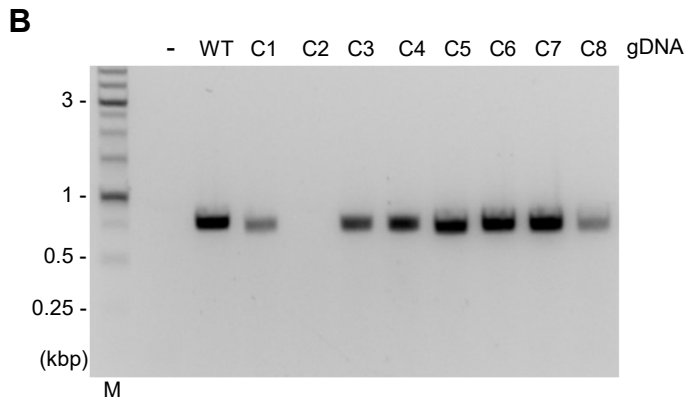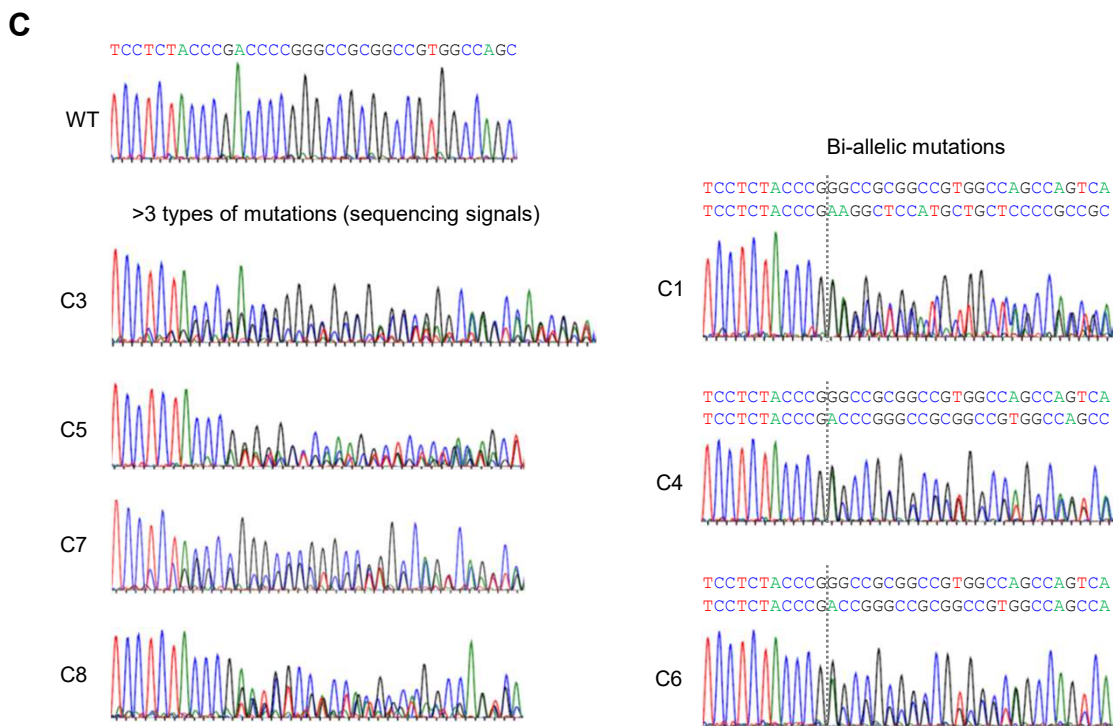

Supplementary Figure S8



**A**

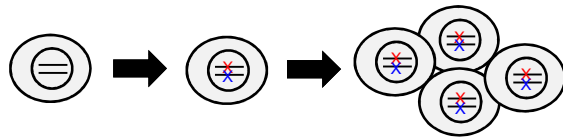

**B**

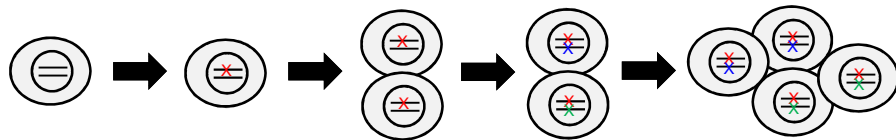

**Supplementary Figure S9**

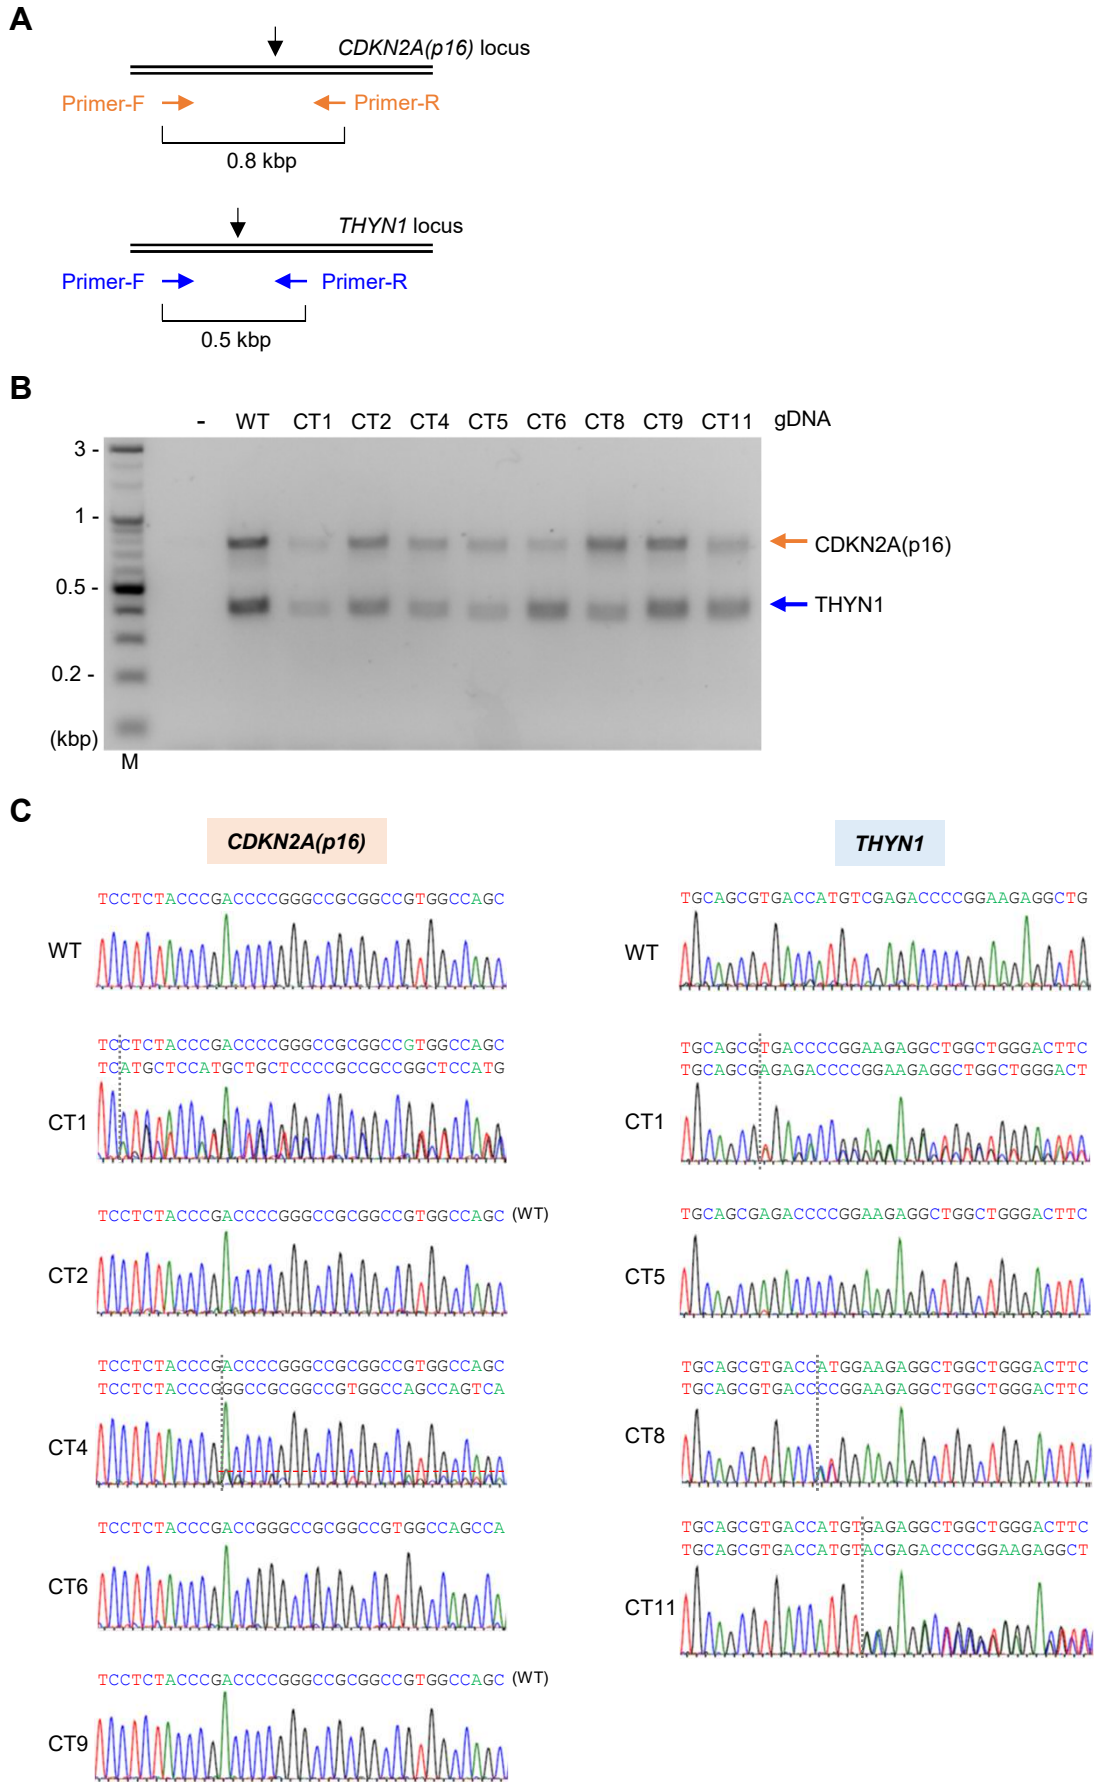

Supplementary Figure S10

### CDKN2A(p16)

↓

WT | 5' - . . GCCTTCGGCTGACTGGCTGGCCACGGCCGCGGCCCGGGGTCGGGTAGAGGAGGTGC . . -3'  
5' - . . GCCTTCGGCTGACTGGCTGGCCACGGCCGCGGCCCGGGGTCGGGTAGAGGAGGTGC . . -3'

CT1 | 5' - . . GCCTTCGGCTGACTGGCTGGCCACGGCCGCGGCCCGGGGTCGGGTAGAGGAGGTGC . . -3' deletion  
5' - . . GCAT-----GAGGTGC . . -3' deletion

CT4 | 5' - . . GCCTTCGGCTGACTGGCTGGCCACGGCCGCGGCCCGGGGTCGGGTAGAGGAGGTGC . . -3'  
5' - . . GCCTTCGGCTGACTGGCTGGCCACGGCCGCGGCC-----CGGGTAGAGGAGGTGC . . -3' deletion

CT6 | 5' - . . GCCTTCGGCTGACTGGCTGGCCACGGCCGCGGCCCG--GTCGGGTAGAGGAGGTGC . . -3' deletion  
5' - . . GCCTTCGGCTGACTGGCTGGCCACGGCCGCGGCCCG--GTCGGGTAGAGGAGGTGC . . -3' deletion

### THYN1

↓

WT | 5' - . . GCACTAAAGTCCCCTGCAGCGTGA~~CCAT~~GTTCGAGACCCCCGGAAGAGGCTGGC . . -3'  
5' - . . GCACTAAAGTCCCCTGCAGCGTGA~~CCAT~~GTTCGAGACCCCCGGAAGAGGCTGGC . . -3'

CT1 | 5' - . . GCACTAAAGTCCCCTGCAGCGT-----GACCCCCGGAAGAGGCTGGC . . -3' deletion  
5' - . . GCACTAAAGTCCCCTGCAGCG-----AGAGACCCCCGGAAGAGGCTGGC . . -3' deletion

CT5 | 5' - . . GCACTAAAGTCCCCTGCAGCG-----AGACCCCCGGAAGAGGCTGGC . . -3' deletion  
5' - . . GCACTAAAGTCCCCTGCAGCG-----AGACCCCCGGAAGAGGCTGGC . . -3' deletion

CT8 | 5' - . . GCACTAAAGTCCCCTGCAGCGTGACCAT-----GGAAGAGGCTGGC . . -3' deletion  
5' - . . GCACTAAAGTCCCCTGCAGCGTGA-----CCCCGGAAGAGGCTGGC . . -3' deletion

CT11 | 5' - . . GCACTAAAGTCCCCTGCAGCGTGACCATGT-----G-AGAGGCTGGC . . -3' deletion  
5' - . . GCACTAAAGTCCCCTGCAGCGTGACCATGTTCGAGACCCCCGGAAGAGGCTGGC . . -3' insertion  
A

Supplementary Figure S11

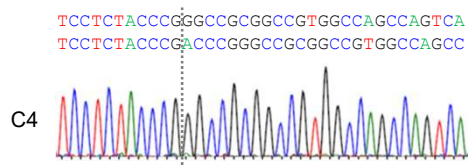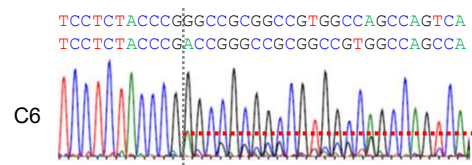

**Supplementary Figure S12**

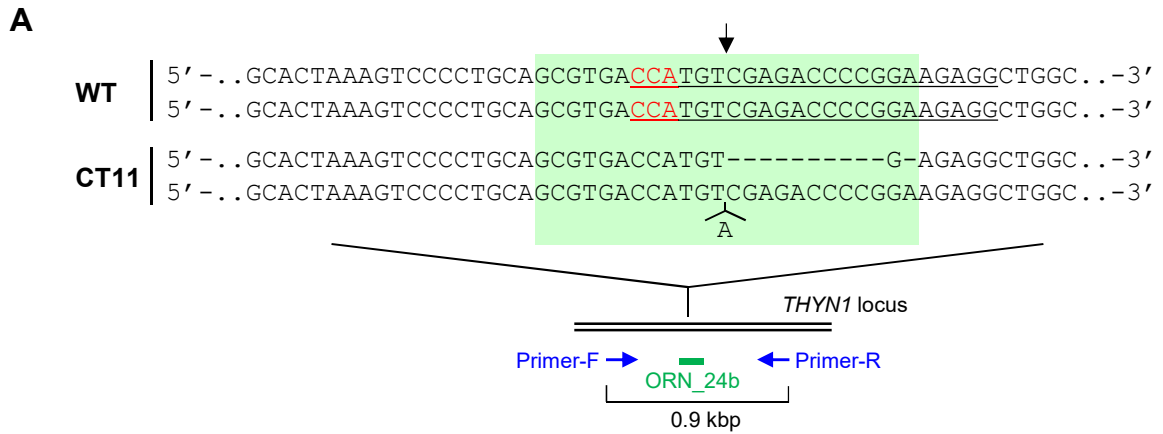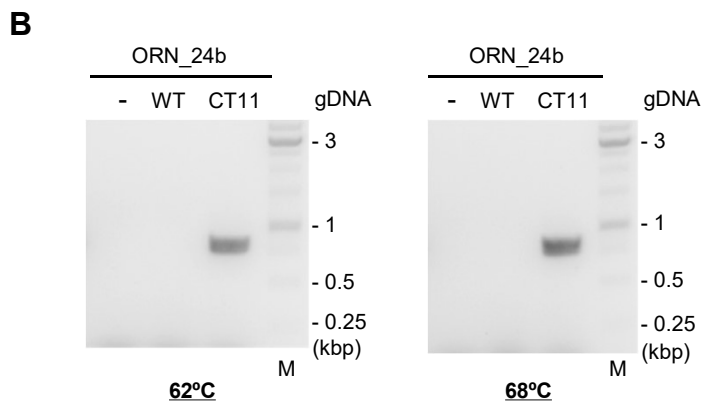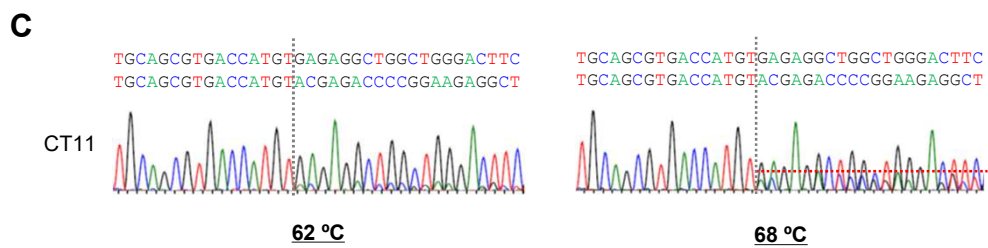

**Supplementary Figure S13**

**A**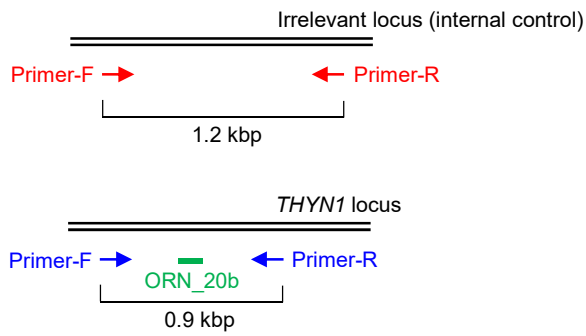**B**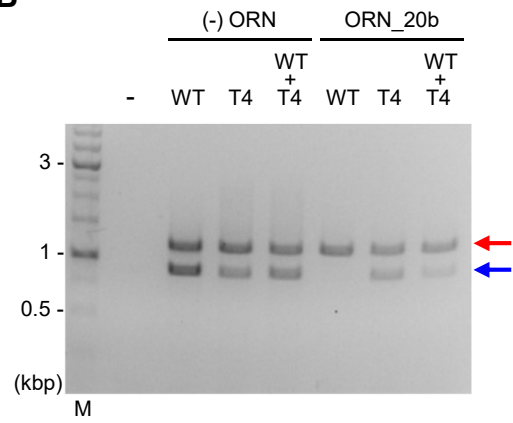**C**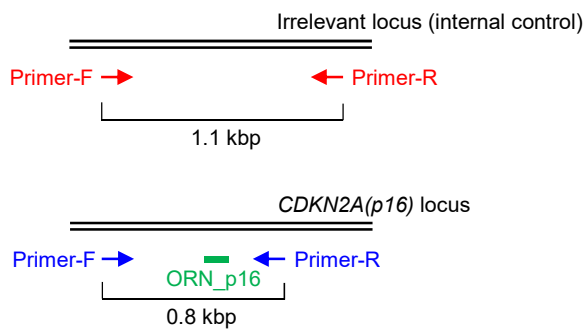**D**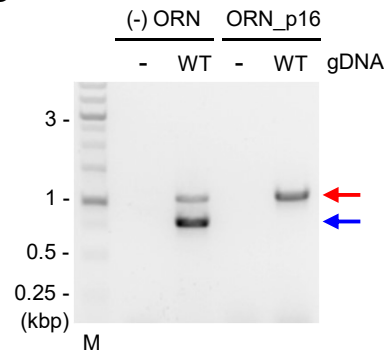**E**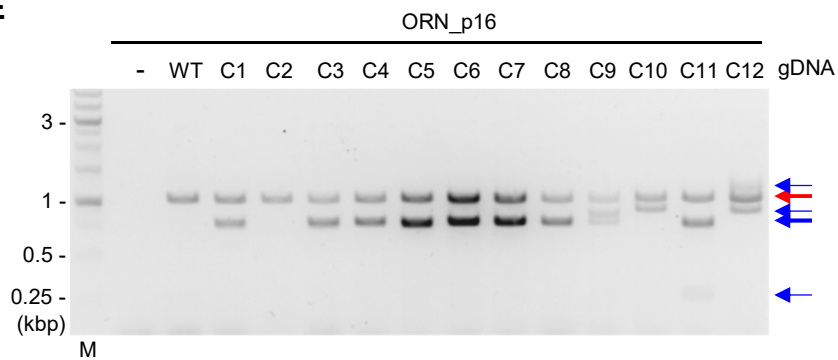**Supplementary Figure S14**
